# Supplementary material
Source: publisher site journal article supplement (http://www.degruyter.com/publication/journal_key/BMTE/downloadAsset/BMTE_Instructions%20for%20Authors.pdf)
Supplement: Supplementary file 1 [file BMTE_Instructions%20for%20Authors.pdf]

# Biomedical Engineering Biomedizinische Technik

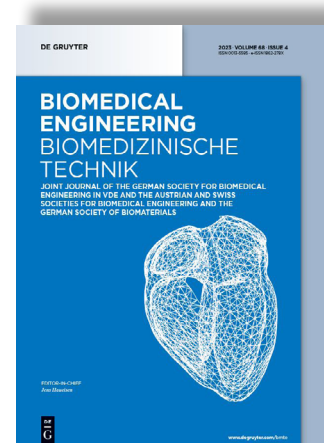

## Table of Contents

|                                                                     |   |
|---------------------------------------------------------------------|---|
| <b>Scope and general policies of the journal</b> .....              | 2 |
| Scope .....                                                         | 2 |
| Article (manuscript) categories .....                               | 2 |
| <b>Peer review, turnaround times and preprint policies</b> .....    | 2 |
| Peer review information .....                                       | 2 |
| Turnaround time .....                                               | 2 |
| Rejection of manuscripts .....                                      | 2 |
| Appeals .....                                                       | 2 |
| Preprint policy .....                                               | 2 |
| Inclusive language policy .....                                     | 2 |
| <b>Submission of manuscripts</b> .....                              | 3 |
| ORCID .....                                                         | 3 |
| Submission declaration and verification .....                       | 3 |
| Scientific misconduct .....                                         | 3 |
| Research integrity .....                                            | 3 |
| <b>Post-acceptance</b> .....                                        | 4 |
| Galley proofs .....                                                 | 4 |
| Offprints .....                                                     | 4 |
| Repository policy .....                                             | 4 |
| Subscription-based and hybrid journals .....                        | 4 |
| Note for authors of NIH-funded research .....                       | 4 |
| PMC and Research Funder Policies .....                              | 4 |
| Copyright .....                                                     | 4 |
| Open Access in hybrid journals .....                                | 4 |
| Article Processing Charges (APCs) .....                             | 5 |
| Open Access and Research Gate .....                                 | 5 |
| <b>Ethical conduct of research</b> .....                            | 5 |
| Acknowledgments .....                                               | 5 |
| Authorization for the use of human subjects – research ethics ..... | 5 |
| Authorization for the use of experimental animals .....             | 5 |
| Informed consent .....                                              | 6 |
| Author contributions .....                                          | 6 |
| Competing interests .....                                           | 6 |
| Research funding .....                                              | 6 |
| Data availability .....                                             | 6 |
| Trial registration .....                                            | 6 |
| <b>Preparation of manuscript</b> .....                              | 7 |
| Manuscript templates .....                                          | 7 |
| Title page information .....                                        | 7 |
| Language .....                                                      | 7 |
| General format and manuscript elements .....                        | 7 |
| Abstract .....                                                      | 8 |
| Keywords .....                                                      | 8 |
| Headings .....                                                      | 8 |
| References .....                                                    | 8 |
| Figures and figure captions .....                                   | 8 |
| Tables and table captions .....                                     | 8 |
| Abbreviations .....                                                 | 9 |
| Equations and symbols .....                                         | 9 |
| Units .....                                                         | 9 |
| Manufacturer details .....                                          | 9 |
| Audio and Video .....                                               | 9 |
| Appendices .....                                                    | 9 |
| Supplementary material .....                                        | 9 |

## Scope and general policies of the journal

### Scope

*Biomedical Engineering - Biomedizinische Technik (BME–BMT)* is a high quality forum for the exchange of knowledge in the fields of biomedical engineering, medical information technology and biotechnology/bioengineering. As an established peer-reviewed journal with a tradition of more than 60 years, BME-BMT addresses engineers, natural scientists, and clinicians working in research, industry, or clinical practice. The journal welcomes English language Research Articles and Reviews related to diagnostic imaging, image processing, biosignal processing, modeling and simulation, biomechanics, information and communication in medicine, telemedicine and e-health, surgery, minimum invasive interventions, endoscopy, image guided therapy, diagnostic and therapeutic instrumentation, clinical engineering, micro- and nanosystems in medicine, active implants, biosensors, neuro-engineering, neural systems, rehabilitation and prosthetics, biomaterials, cellular and tissue engineering, artificial organs, biomedical engineering for audiology, ophthalmology, emergency and dental medicine.

### Article (manuscript) categories

- Research Article
- Review Article
- Short Communication

## Peer review, turnaround times and preprint policies

### Peer review information

*BME–BMT* is a single-blind peer-reviewed journal. Manuscripts are reviewed anonymously by at least two independent reviewers selected by the Editors. The authors must provide the names, institution, country and e-mail addresses of at least three potential reviewers. Reviewers indicated by the authors must be of institutions different from those of any of the authors and should be of different nationality. Authors may also provide names of reviewers they wish to exclude from reviewing their manuscripts.

The editors reserve the right to reject submitted manuscripts without peer review if the studies are not novel or important enough to merit publication in the journal. Manuscripts deemed unsuitable (insufficient originality or limited interest to the target audience) will be also rejected without review.

### Turnaround time

*BME–BMT* aspires to inform authors of the editorial decision within approx. 4 weeks from the submission date. Revised manuscripts should be returned within 8 weeks. Accepted articles will be published online within 2–4 weeks of acceptance. They are first published online as DOI-citable articles and are later assigned to an issue with final page numbers.

### Rejection of manuscripts

Manuscripts dealing with subjects that have been well studied in the literature, and that do not resolve questions raised by previous studies, or manuscripts that are statistically underpowered, are likely to be rejected without peer review. Reporting of negative results must be justified by prior evidence that a positive result would be expected. Manuscripts are also returned to authors if they do not comply with the Instructions for Authors.

### Appeals

Manuscripts that have been rejected for publication will be reconsidered only at the discretion of the Editor(s). Authors wishing to request reconsideration of a previously rejected manuscript must do so in written form and submit a rebuttal by e-mail to the journal's editorial office. Authors should provide detailed reasons why they believe the manuscript should be reconsidered. If the rebuttal is accepted, the author will be asked to re-submit the manuscript, or the decision will be reversed.

### Preprint policy

De Gruyter does not consider the following purposes of a paper as pre-publication: publication in the form of a congress abstract, publication as an academic thesis, publication as an electronic preprint on recognized servers such as arXiv, RePEc, bioRxiv, ResearchSquare, etc.

### Inclusive language policy

Inclusive language recognizes diversity, conveys respect for all people, is sensitive to differences and promotes equal opportunities. Content should not make assumptions about readers' beliefs or commitments; should not

contain anything that might suggest that one person is superior to another because of age, gender, race, ethnicity, culture, sexual orientation, disability or health condition; and should use inclusive language throughout. Authors should ensure that their writing is free from prejudice, stereotypes, slang, references to the dominant culture and/or cultural assumptions.

## Submission of manuscripts

- Submit manuscripts exclusively online at: <https://mc.manuscriptcentral.com/bmt>

We strongly recommend the authors register with institutional e-mail addresses, and refrain from using private/commercial e-mail addresses. A cover letter must be submitted for each manuscript upon first submission. It should contain a brief statement by the authors as to the element of novelty upon which they base their request for publication in *BME–BMT*. Please address the cover letter to the Editor-in-Chief. Revised manuscripts must be accompanied by a point-by-point reply to the reviewers' criticisms. Major changes in the revised manuscript must be highlighted, preferably in tracked changes mode. A second, unmarked version should always be submitted for major changes.

### ORCID

The ORCID (Open Researcher and Contributor ID) is a non-profit, publisher-independent system that is used to uniquely identify academics and their publications. Click [here](#) for detailed information about ORCID. Submitting authors can login with username and password, but they can also login with their ORCID number. Providing an ORCID number for each author is strongly recommended. ORCID numbers should be listed on the title page.

### Submission declaration and verification

For information on plagiarism, please refer to [COPE – Committee of Publication Ethics](#). Submission of a manuscript to a journal implies that the work described has not been published previously, except in the form of an abstract, academic thesis, lecture, or preprint; that it is not under consideration for publication elsewhere (multiple, redundant, concurrent publication); that publication of the work is approved by all authors and tacitly or explicitly by the responsible authorities where the work was carried out; and that, if accepted for publication, it will not be published elsewhere, no matter in which language, without the written consent of the Publisher. Exceptions are listed under Preprint policy.

To exclude potential overlap with prior publication(s), your manuscript may be checked by the plagiarism detection tool Crossref Similarity Check ([iThenticate](#)). Previously published material must be referenced appropriately in the manuscript, regardless of whether the material was previously published in a subscription based, hybrid or open access journal, or in another language.

### Scientific misconduct

Only articles that have not been or will not be published elsewhere will be published in the journal, excluding articles that fall under De Gruyter's [Repository Policy](#). Multiple submissions/publications or redundant publications (i.e., republication of data already published by the same authors) will be rejected. If identified after publication, the journal reserves the right to publish a retraction note. In any case, editors will follow COPE's Code of Conduct and implement its advice.

### Research integrity

The authors are responsible for all aspects of the study and will ensure that any questions regarding the accuracy and integrity of any part of the work are adequately investigated and resolved. With submitting your manuscript to *BME–BMT* the authors declare that they are the sole and intellectual authors of the manuscript. We do not accept submissions that name Artificial Intelligence (AI) and/or Machine Learning Tools as credited author(s) on a manuscript because such tools cannot take responsibility for the submitted work and therefore cannot be considered as eligible authors. Where such tools or technologies are used as part of the design or methodology of a research study, their use should be clearly described in the Acknowledgments section. In case of doubt, the Editorial Board reserves the right to ask the authors to submit the raw experimental data.

## Post-acceptance

### Galley proofs

The corresponding author of an article receives the galley proofs in electronic form to check them for editing and typesetting accuracy. Corresponding authors receive an e-mail notification (“Check your proof”) with a link to the online proofreading system (Proof Central) through which they can access their galley proofs. The interface is similar to MS Word: authors can edit the text by entering their corrections directly, adding comments, and answering questions from the copy editor. If preferred, authors can also annotate and upload edits to the PDF version. All instructions for proof corrections, including deadlines, will be given in the e-mail notification to the corresponding author, along with a user guide, providing step-by-step instructions for inserting corrections.

Substantial changes to an article accepted for publication will only be considered with the permission of the Editor or after additional peer review. The responsibility for proofreading lies solely with the authors.

**According to De Gruyter policy, once an article has been accepted, no changes to the author list and article title are allowed (except typos). The De Gruyter production team is instructed to enforce this policy during the production/proof correction process.**

### Offprints

Electronic files of typeset articles in Adobe Acrobat PDF format are provided free of charge. The corresponding author will receive an e-mail notification when the article has been published online along with instructions on how to access the article.

### Repository policy

Policies for sharing published journal articles differ for subscription-based and open access articles.

### Subscription-based and hybrid journals

Authors may publish their articles in a public repository after an embargo period of 12 months (see De Gruyter’s [Repository Policy](#)). Only the accepted author version of the manuscript, not the PDF version of the published article, can be published:

Immediately

- via their non-commercial personal website, blog or social media channels
- by updating a preprint in arXiv, RePEc, bioRxiv, ResearchSquare, etc. with the version of the accepted manuscript
- as a closed deposit via their research institute or institutional repository for internal institutional purposes or as part of an invitation-only research collaboration workgroup
- directly by providing copies to their students or to research collaborators for their personal use
- for private scholarly sharing as part of an invitation-only work group

After an embargo period

- as open deposits to institutional or subject repositories
- to scholarly collaboration networks (SCNs)

### Note for authors of NIH-funded research

De Gruyter acknowledges that the author of a US-agency-funded article retains the right to provide a copy of the final manuscript to agency upon acceptance for publication or thereafter, for public archiving in PubMed Central 12 months after publication in *BME–BMT*. Note that only the accepted author’s version of the manuscript, not the PDF file of the published article, can be used for NIH archiving.

### PMC and Research Funder Policies

U.S government agencies and private funders have partnerships with NLM to leverage the PMC infrastructure. Scientific work funded by these agencies and private funders will be automatically listed in PMC. You can find the list of potential donors [here](#).

### Copyright

Manuscripts submitted to subscription and hybrid journals are accepted on condition of transfer of copyright ([License to Publish](#)) (for U.S. government employees: to the extent transferable) to the publisher. Once the manuscript has been accepted, it may not be published elsewhere without the consent of the copyright holders.

### Open Access in hybrid journals

The author declares consent to place the article under the Creative Commons license CC-BY 4.0. In this case, the exclusive rights previously granted to the publisher will be converted into non-exclusive rights. The author con-

firms that they have already acquired all necessary rights for all components of the work in the event of an open access publication. For more information, refer to paragraph 5 in the [License to Publish](#).

### Article Processing Charges (APCs)

Authors publishing in **hybrid journals** do not have to pay APCs if they do not wish to publish their article open access. After acceptance and before production of an article, authors can decide whether to publish their article open access. Only if they decide to publish open access, APCs will be charged. All articles are peer-reviewed and accepted for publication based on the quality of their scientific contribution. The decision to publish open access does not affect the peer review process or the acceptance of the article. De Gruyter has [institutional agreements](#) in place that allow authors to publish open access articles at no cost at all – or with a significant discount. For more information on De Gruyter's open access policy, please read our [Open Access Policies](#).

### Open Access and Research Gate

Authors publishing Open Access will see their articles automatically added to their publication pages on [Research Gate](#).

## Ethical conduct of research

**Manuscripts must follow certain ethical guidelines** to be considered for publication. These can generally be found in the [Publication Ethics and Malpractice Statement](#). Accordingly, **before submitting your manuscript, please make sure that you and your co-authors agree to the applicable requirements**. For example, this may involve declaring and ruling out conflicts of interest or proving compliance with legal requirements related to human and animal testing.

Furthermore, our [Code of Conduct for Publication Procedures and Ethics](#) defines the responsibility of De Gruyter as a publisher and the Editors we work with, to ensure the legitimacy and quality of our published research. Our principles are based on the guidelines of the [Committee on Publication Ethics \(COPE\)](#).

### Acknowledgments

Authors may wish to acknowledge individuals, working groups, institutions, etc. who provided help and support (other than financial) during research and the preparation of the manuscript (e.g., language checking, writing assistance or proof reading of the article, etc.). Individuals acknowledged are not included on the title page, as a footnote to the title or otherwise.

### Authorization for the use of human subjects – research ethics

Manuscripts that contain information on the use of humans should clearly state that the research complies with all relevant national regulations and institutional policies and has been approved by the authors' Institutional Review Board or any equivalent Committee. Copies of the guidelines and policy statements must be available for review by the Editor; if necessary. The Editors reserve the right to seek additional information or guidance from reviewers on any cases in which concerns arise. All investigations with human subjects must be conducted by following the tenets of the [Declaration of Helsinki](#), what is more authors must identify the Committee or Institutional Review Board approving the experiments, and provide a statement indicating approval of the research. If applicable, information on research ethics and/or approval by the Institutional Review Board should be provided.

The "[Template for Ethical and Legal Declarations](#)" file, customized by the authors as appropriate, is required for manuscript submission. In this document authors are asked to comment on Research Ethics. Give all relevant information in the dedicated sub-sections.

### Authorization for the use of experimental animals

Manuscripts that contain information on the use of animals should clearly state that the research has complied with all relevant national regulations and institutional policies and has been approved by the authors' Institutional Review Board or any equivalent Committee. Copies of the guidelines and policy statements must be available for review by the Editor; if necessary. The Editors reserve the right to seek additional information or guidance from reviewers on any cases in which concerns arise. The research using animal subjects should be conducted according to the Principles of Laboratory Animal Care and similar documents (e.g. [NIH](#)). For manuscripts reporting experiments on live vertebrates or higher invertebrates, authors must identify the Committee approving the experiments, and must confirm that all experiments were performed in accordance with relevant regulations. If applicable, information on research ethics and/or approval by the Institutional Review Board should be given in the "[Template for Ethical and Legal Declarations](#)" file.



### Informed consent

The [Protection of Privacy](#) is a legal right that must not be infringed without individual informed consent. In cases where the identification of personal information is necessary for scientific reasons, authors should obtain full documentation of informed consent, including written permission from the patient or their legal guardians prior to inclusion in the study. The following (or similar) statement should be given in the “[Template for Ethical and Legal Declarations](#)”: *Informed consent was obtained from all individuals included in this study.* If informed consent was not required, insert *Not applicable*.

### Author contributions

In view of research integrity, authorship is generally confined to an individual who has made a substantial intellectual or practical contribution to the conception or design of the project or the acquisition, analysis, or interpretation of data for the work of a publication and/or has drafted the work or reviewed/revised it critically for important intellectual content. The individual(s) listed as author(s) must agree to be accountable for said contribution and approve of the final version. **Honorary authorship is not allowed.**

Individuals who helped or participated in certain substantive aspects of the project or work (e.g., technical services staff), but whose contributions were not of sufficient extent to be listed as co-authors, should be appropriately acknowledged, usually in an Acknowledgements section.

Authors must declare their responsibility for the entire content of the manuscript and may indicate the individual contributions of each author, if applicable, in the “[Template for Ethical and Legal Declarations](#)” file.

### Competing interests

A conflict of interest for a particular manuscript exists when a participant in the peer review and publication process – author, reviewer, and Editor – has ties to activities that could inappropriately influence his or her judgment, regardless of whether the judgment is actually affected. Financial relationships with industry (for example, employment, consultancies, stock ownership, honoraria, patent applications, expert testimony, grants and other funding), either directly or through immediate family, are usually considered the most important conflicts of interest. However, conflicts can occur for other reasons, such as financial support of the study, ties to health insurance, politics or other stakeholders, personal relationships, academic competition, and intellectual passion. To ensure fair and objective decision-making, authors must declare any associations that pose a conflict of interest (financial, personal or professional) in connection with the manuscript under evaluation. The conflict-of-interest statement should be given in the “[Template for Ethical and Legal Declarations](#)”. If none of the authors have a conflict of interest, the default statement will be set in place: *The authors state no conflict of interest.*

### Research funding

Funding sources should be indicated in the “[Template for Ethical and Legal Declarations](#)” under Research Funding. When the study benefitted from funding through an unrestricted grant or other resources provided to a university, college, other research institution, or an individual author, state the name of the institute or organization that provided the funding along with the grant number, if applicable. If no funding was provided for the research, the default statement will be set in place: *None declared.*

### Data availability

BME–BMT requires authors to follow our [Data Sharing Policy](#), which must comply with the European GDPR (*General Data Protection Regulation*) rules. Research data should be made widely available to the research community to demonstrate the robustness and validity of the research presented in the journal, to enable and encourage replication of the results, and to allow the community with opportunities to learn.

By publishing in the journal, authors are required to provide a data availability statement (DAS). The DAS confirms the presence or absence of shared data. The DAS should include information on where the data supporting the findings reported in the article can be found, including, if applicable, hyperlinks to publicly archived datasets analyzed or generated during the study. If research data is not publicly available, this must be indicated, as well as the conditions for accessing the data. Authors are encouraged to share their data but are not required to do so. The decision to publish will not be affected by whether or not authors share their research data. The DAS should be included in the “[Template for Ethical and Legal Declarations](#)”, which is required for submission.

### Trial registration

If applicable, the universal trial number (UTN) must be specified. A UTN is a unique number generated by WHO for each clinical trial registered in one of the WHO primary registries. It is intended to facilitate study identification and is displayed on the WHO International Clinical Trials Registry Platform (ICTRP) search portal. The UTN should be published at the end of the Author's Statement.

## Preparation of manuscript

### Manuscript templates

BME–BMT provides authors with an individual word processor template for the main article types (accessible from the Supplementary Materials section on the [journal website](#)). Manuscripts in Microsoft Word or LaTeX Format can be submitted; in the latter case a complete PDF file prepared from the LaTeX source file(s) must be uploaded as “Main Document”.

### Title page information

Please provide the following information on the first page of your manuscript during the submission process:

- Author names

Write at least one given and family name in full. For all other names, initial is sufficient. List authors in the order you want them to appear in the final version. Indicate the corresponding author(s) by using an asterisk “\*” after the family name. Please note that as per De Gruyter policy, no author list changes are permitted after acceptance of a manuscript.

Author footnotes (superscript letters or numbers) to explain authorship details are not all allowed in the author line and will be converted to an author note on the first page. Kindly stick to the wording as in the examples below:

- [Full name author A] and [full name author B] contributed equally to this work.
- [Full name author A] and [full name author B] contributed equally to this work and share first authorship.
- [Full name author A] and [full name author B] share senior authorship.

- Title and short title

Provide a descriptive, concise and comprehensible main title as well as an abbreviated form of the main title (running head) with no more than 75 characters (including blanks). The short title will be displayed on the top of each page of the final version. The article title and subtitle should be in sentence case. Use lowercase letters after colon.

- Affiliations

For the corresponding author(s) supply the following details: e-mail address, department, institution, street, city, postal code and country; for all other authors department, institution, city, postal code and country are mandatory. Please also provide all details concerning the current institutional affiliation in case you changed affiliation during the manuscript preparation and publication process.

Supplying an ORCID is highly recommended (for more information and registration, please visit the ORCID webpage: <https://info.orcid.org/benefits-for-researchers/>)

### Language

All manuscripts must be written in clear and concise English. Please use British or American English consistently. If you have reasons to doubt your proficiency with respect to spelling, grammar, etc. (e.g., because English is not your native language), then you may wish to employ – at your expense – the services of a professional language editor.

### General format and manuscript elements

**General structure of the text body:** Research Articles should be organized into title page, Abstract (structured), Keywords, list of non-standard Abbreviations (optional), Introduction, Materials and Methods, Results, Discussion, Acknowledgements, References, Table and Figure legends. Review articles should include title page, Abstract (structured or unstructured), Keywords, text body with subsections, and References.

Short Communications should be subdivided into a

|                     | Word count | Word count in abstract       | Number of keywords | Number of tables & figures | Number of references |
|---------------------|------------|------------------------------|--------------------|----------------------------|----------------------|
| Research Article    | 6000       | 200, structured              | 3-6                | 8                          | 35                   |
| Review              | 8000       | 200, structured/unstructured | 3-6                | 8                          | 75                   |
| Short Communication | 3000       | 200, structured              | 3-6                | 2                          | 20                   |

title page, Abstract (structured), Keywords, and a single section of main text without headings. Experimental procedures should be described in legends to figures or footnotes to tables. Acknowledgments and References should be presented as in full-length papers.

### Abstract

Give a concise summary of your article in an abstract of 200 words maximum. As abstracts are published separately by abstracting and indexing services, please spell out abbreviations at first use and do not include footnotes, tables, figures or equations. Avoid using references. If it is essential to use a literature reference in the abstract, please give full bibliographic details as per journal reference style. Abstracts are to be structured with the following headings:

- Research Articles and Short Communications: Objectives; Methods; Results; Conclusions.

Abstracts for Reviews can be structured. If you submit a structured abstract, please arrange it by using the following headings: Objectives; Content; Summary and Outlook.

### Keywords

Keywords are used by abstracting and indexing services as well as search engines to facilitate finding your paper. Together with the abstract of your paper, they are a key tool enabling readers to find your paper and for increasing citations. Supply 3–6 specific keywords (depending on article type) in alphabetical order and lower case, separated by semicolon. These can be single words, but also short phrases representing the content. Make sure to select precise and concise keywords to your field or sub-field of research. Avoid abbreviations and the repetition of words already used in the article's title.

### Headings

Your manuscript should be subdivided into sections (and, if necessary, subsections). These sections should be labeled with headings in a consistent format and with a clear hierarchy of section headings. Limit your subsections to a maximum of four levels. For subdivided sections ensure that they have at least two subheadings on one level. Headings should be un-numbered and in sentence case, and do not have an end period. Use lowercase letters after colon. Please clearly indicate the section headings hierarchy by using e.g., different font size.

### References

Please adhere strictly to the reference style of *BME–BMT* as outlined below (Vancouver style). There are examples for different types of citations in the text as well as for different bibliographic items in the reference list are provided. All references mentioned in the reference list must be mentioned in the text, and *vice versa*. List and number the references consecutively in the order that they appear in the text, including tables and figures.

### Figures and figure captions

Graphs, line drawings, photographs, schemes, diagrams, etc. may be used to illustrate your findings. Publication of color figures is provided free of charge in both online and print editions. The publication quality always depends directly on the quality and size of the delivered data.

Please label the illustrations as “Figure”. Each figure should be uploaded separately as .jpg, .eps, .png or .tiff file. Images should have a minimum resolution of 300 dpi (color or black-white pixel graphics/half-tone images) or 600 dpi (combination of pixel graphic and line drawing) in the intended size. When drawing bar graphs, use patterning/color instead of grey scales (faint shading may be lost upon reproduction).

Figures should be numbered consecutively using Arabic numerals (from 1) throughout the text. If you include multi-part figures, please make sure to label all part figures by using uppercase letters. Please make sure that all figures are explicitly referred to in the text. Do not end the text immediately preceding the suggested positioning of a figure with a colon and avoid expressions such as “in Figure 1 below/above”, as the exact positioning of these elements cannot be determined until after the manuscript has been typeset.

Provide a concise and self-explanatory caption for each figure. In case of multi-part figures, please include a main caption as well as legends for the individual figure panels. The key to the symbols depicted in the figures should be included in the figure itself, where possible. Otherwise, include it in the caption/legends. The caption itself should not be included in the figure. Please make sure that letters, numbers, symbols, text, etc. included in the figure are clear, easy to read (not below 6 pt, preferably in Arial or Helvetica font) and uniform in style.

It is the authors' responsibility to use images that do not infringe on any copyrights, performing rights, trademark rights, personal rights or any other third-party rights or are otherwise unlawful. Copyright permissions can be obtained through the Copyright Clearance Center (<https://www.copyright.com/>).

### Tables and table captions

Number tables consecutively using Arabic numerals. Tables should be provided in an editable source format (Word, LaTeX). Do not provide tables as image or Excel files. Provide a short descriptive title, column heads, and



(if necessary) footnotes to make each table self-explanatory. In column heads, separate units with a comma and use parentheses or square brackets for additional measures (e.g., %, range, etc.). Use footnotes in alphabetical order (a, b, c, etc.) to give further information. Expand abbreviations used in tables in footnotes. In case bold type is used to highlight information, please explain its meaning. Indicate where to place the table approximately (e.g., [Place Table 1 near here]). Do not end the text immediately preceding the suggested positioning of a table with a colon and avoid expressions such as “in Table 1 below/above”, as the exact positioning of these elements cannot be determined until after the manuscript has been typeset.

### **Abbreviations**

The use of abbreviations and acronyms is permitted given that they are expanded in full when used the first time with the abbreviation in parentheses (applies to abstract and main text). Please use them consistently thereafter. Avoid using non-standard abbreviations unless they appear more than three times in the text. It is possible to provide a list of all abbreviations, which should be positioned after the Abstract/keywords.

### **Equations and symbols**

Equations should be well-aligned and not crowded. Use only Latin and Greek alphabets. Avoid complicated superscripts and subscripts by introducing new symbols. Avoid repetition of a complicated expression by representing it with a symbol. For MS Word submissions, create equations using the Microsoft equation editor or a corresponding add-on. Do not submit math equations as images, but as editable text. Number displayed equations consecutively with Arabic numerals (if referred to in the text).

### **Units**

Use SI units. For more information, please visit <https://www.bipm.org/en/home>

### **Manufacturer details**

For all products used (such as reagents and apparatus), supply the manufacturer name, city, (state abbreviation, if applicable), country. Example: Cobas® EGFR Mutation Test CE-IVD (Roche Molecular Systems, Pleasanton, CA, USA).

### **Audio and Video**

For all examples connected to an audio/video recording, supply audio/video clips. Deliver these clips as separate files and do not integrate them directly into the manuscript. Name all your clips using the following convention: e.g., audio-1-smith.MP3, video-1-smith.MP4, [media]-[identifier]-[author-family-name].[extension]. Indicate the position in the article by placing a marker as follows: [associated audio-1-smith.wav with example (1)]. Provide a short caption for each media file and number them consecutively. Any other media files can be included as part of the supplementary material. File naming: audiosupplement-1-smith.MP3, [media.supplement]-[identifier]-[author-family-name].[extension]. The following formats are preferred: audio files in MP3 (at least 16 bit) and video files in MP4 (at least a height of 480 pixels and a frame rate of 25). However, other common formats are also permitted.

### **Appendices**

Use appendices for information that supports your findings but is not essential for the understanding of your paper (e.g., lengthy mathematical proofs, tables, graphics, etc.). Cite appendices within the main text. Tables and figures in the appendix should be numbered consecutively as follows: Figure A.1, Table A.1, Figure A.2, Table A.2, etc. The appendix is placed at the end of the main text before the reference list.

### **Supplementary material**

Supplementary material which may offer further information on your work but does not belong to the core part of the article, will not be part of the typeset article PDF. The material will be made available as a separate download in the online version of the article. Supplementary material may contain questionnaires for discussed surveys, protocols, code samples, datasets, extensive tables, additional figures, multimedia files (audio, video, animations), etc. If the manuscript is accepted, supplementary material will be referenced in the print version, but will be published online only. Please provide supplementary material data as separate file(s) of no more than 10 MB per file during submission. Note that the material should be publication-ready (not in track-changes mode), as it will not be typeset, but published exactly as supplied. Within the text, the supplementary material must be cited consecutively and be referred to as supplementary material data (e.g., see Supplementary Material, Fig. 1, or Figure S1, Table S1, etc.).

**Please contact the Editorial Office for any further questions:**

Biomedical Engineering/Biomedizinische Technik Editorial Office, Walter de Gruyter GmbH, Genthiner Str. 13, D-10785 Berlin, Germany. E-mail: [BMT.editorial@degruyter.com](mailto:BMT.editorial@degruyter.com)

## Reference Style

| In-text citation                                           |                                                                                                                                                                                                                                                                                       |
|------------------------------------------------------------|---------------------------------------------------------------------------------------------------------------------------------------------------------------------------------------------------------------------------------------------------------------------------------------|
| Single reference                                           | [1]                                                                                                                                                                                                                                                                                   |
| Series of references                                       | [2, 8, 25]                                                                                                                                                                                                                                                                            |
| Range of references                                        | [5–12]                                                                                                                                                                                                                                                                                |
| Citation order                                             | Sequential                                                                                                                                                                                                                                                                            |
| References list                                            |                                                                                                                                                                                                                                                                                       |
| Reference type                                             | Example                                                                                                                                                                                                                                                                               |
| Reference list label                                       | Numbered without bracket                                                                                                                                                                                                                                                              |
| 1. Journal article                                         | 1. Schilling T, Bauer M, Biskup C, Haverich A, Hassel T. Engineering of biodegradable magnesium alloy scaffolds to stabilize biological myocardial grafts. <i>Biomed Eng-Biomed Tech</i> 2017;62:493–504.                                                                             |
| 2. Collaboration                                           | 2. WHO. The diagnosis and management of non-alcoholic fatty liver disease: practice guideline by the American Association for the Study of Liver Diseases, American College of Gastroenterology, and the American Gastroenterological Association. <i>Hepatology</i> 2012;55:2005–23. |
| 3. et al. usage (more than 6 authors = 6 authors + et al.) | 3. Gneccchi S, Dutton NAW, Parmesan L, Rae BR, Pellegrini S, McLeod SJ, et al. Analysis of photon detection efficiency and dynamic range in SPAD-based visible light receivers. <i>J Light Technol</i> 2016;34:2774–81.                                                               |
| 4. Epub ahead of print                                     | 4. Walton M, Dewey D, Lebel C. Brain white matter structure and language ability in preschool-aged children. <i>Brain Lang</i> 2017 Nov 10. DOI: 10.1016/j.bandl.2017.10.008. [Epub ahead of print].                                                                                  |
| 5. Online-only Journal                                     | 5. Szlezák NA, Bloom BR, Jamison DT, Keusch GT, Michaud CM, Moon S et al. The Global Health System: Actors, Norms, and Expectations in Transition. <i>PLoS Med</i> 2010;7:e1000183.                                                                                                   |
| 6. Book/monograph                                          | 6. Dössel O, Buzug TM. <i>Biomedizinische Technik: Medizinische Bildgebung</i> . 1st ed. Berlin: De Gruyter; 2014.                                                                                                                                                                    |
| 7. Edited book                                             | 7. Shek DTL, Ma C, Yu L, Merrick J, editors. <i>Human developmental research. Experience from research in Hong Kong</i> . New York: Nova Science; 2014.                                                                                                                               |
| 8. Edited book with chapter title and editors              | 8. Aigner C, Klepetko W. Lung transplantation. In: Petersen C, Ure BM, editors. <i>Thoracic Surgery in Children and Adolescents</i> . Berlin: De Gruyter; 2017:117–27.                                                                                                                |
| 9. Edited book series                                      | 9. Forghieri F, Tkach RW, Chraplyvy AR. Optical fiber telecommunications, Kaminov IP, Koch TL, editors. San Diego, CA: Academic; 1997, vol IIIA.                                                                                                                                      |
| 10. Proceedings/ Conferences                               | 10. Karami MA, Yoon H-J, Charbon E. Single-photon avalanche diodes in sub-100 nm standard CMOS technologies. In: <i>Proc Intl Image Sensor Workshop (IISW)</i> , Hokkaido, Japan, 2011.                                                                                               |
| 11. Electronic publications (Available from)               | 13. Centers for Disease Control and Prevention. Ten Great Public Health Achievements in the 20th Century. [cited 2016 April 4]. Available from: <a href="http://openaccess.mpg.de/Berlin-Declaration">http://openaccess.mpg.de/Berlin-Declaration</a>                                 |
| 12. Thesis/Dissertation                                    | 12. Cotruvo, J. Kinetic model for chlorophyll degradation [Ph.D. thesis]. Cambridge, MA: Massachusetts Institute of Technology; 1996.                                                                                                                                                 |
| 13. Patent                                                 | 13. Pagedas AC. Flexible endoscopic grasping and cutting device and positioning tool assembly. United States patent 20020103498, 2002.                                                                                                                                                |
